# Supplementary material for: Analysis of Photocatalytic Degradation of Phenol with Exfoliated Graphitic Carbon Nitride and Light-Emitting Diodes Using Response Surface Methodology
Source: MDPI journal article supplement (doi:10.3390/catal11080898), 2021-07-25
Supplement: s1 [file s1]

# Analysis of Photocatalytic Degradation of Phenol with Exfoliated Graphitic Carbon Nitride and Light-Emitting Diodes using Response Surface Methodology (RSM)

Adeem Ghaffar Rana <sup>1,2</sup>, and Mirjana Minceva <sup>1,\*</sup>

<sup>1</sup> Biothermodynamics, TUM School of Life Sciences, Technical University of Munich, Maximus-von-Imhof-Forum 2, 85354, Freising, Germany; adeem.rana@tum.de; mirjana.minceva@tum.de;

<sup>2</sup> Department of Chemical, Polymer and Composite Materials Engineering, University of Engineering and Technology (UET), Lahore, Pakistan; adeem.rana@tum.de

\* Correspondence: mirjana.minceva@tum.de; Tel.: (+498161716170)

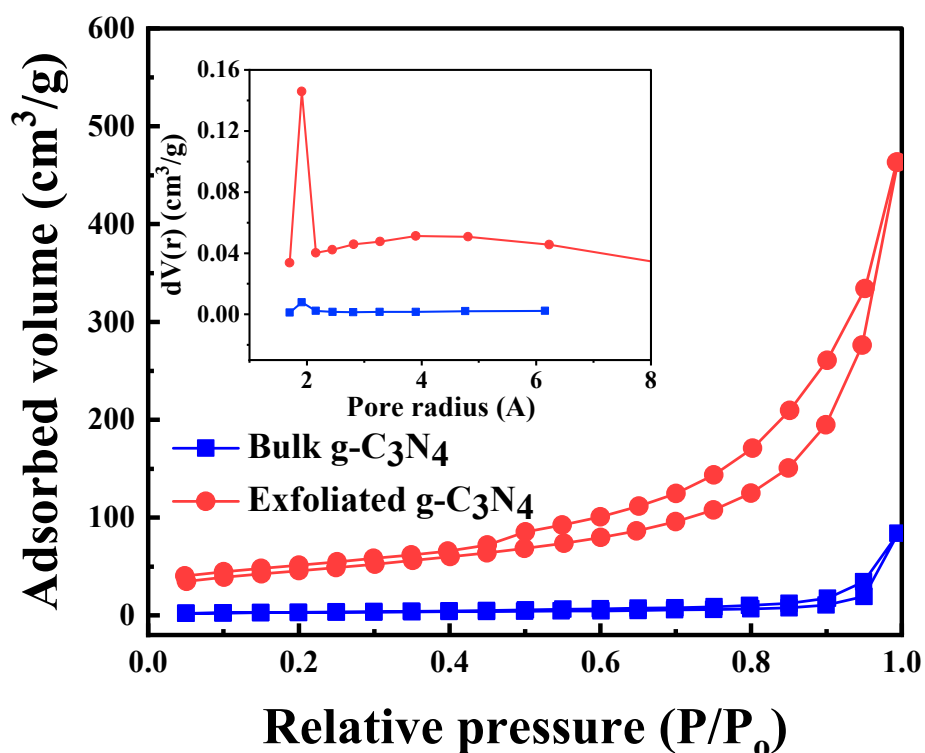

Figure S1 N<sub>2</sub> adsorption-desorption isotherms of bulk and exfoliated g-C<sub>3</sub>N<sub>4</sub>. The inset shows the corresponding BJH pore size distribution curves of the sample

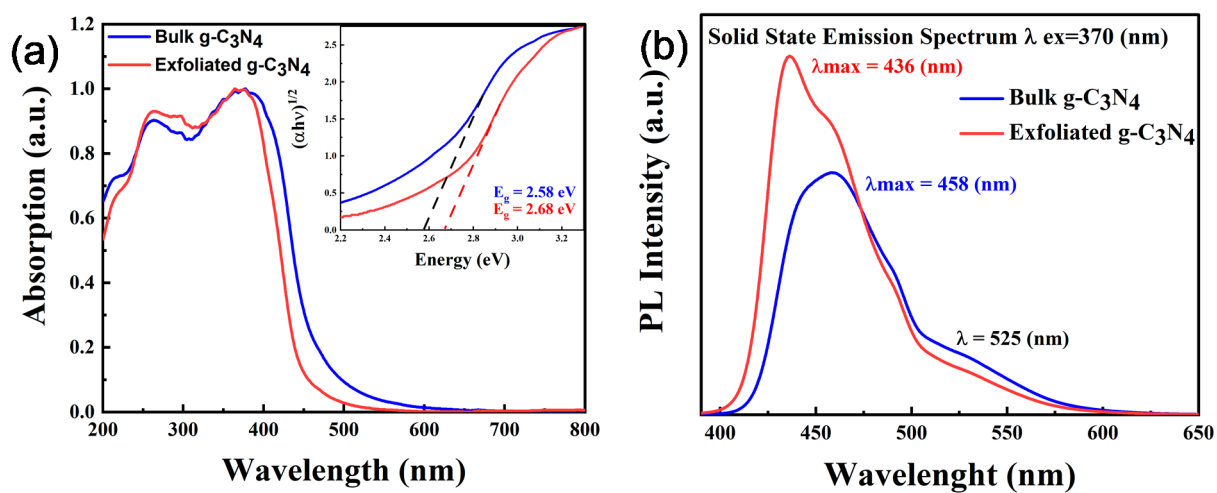

Figure S2 (a) UV-Vis absorption spectra and (b) PL spectra of bulk and exfoliated g-C<sub>3</sub>N<sub>4</sub>; insets of (a) showing the Tauc plots

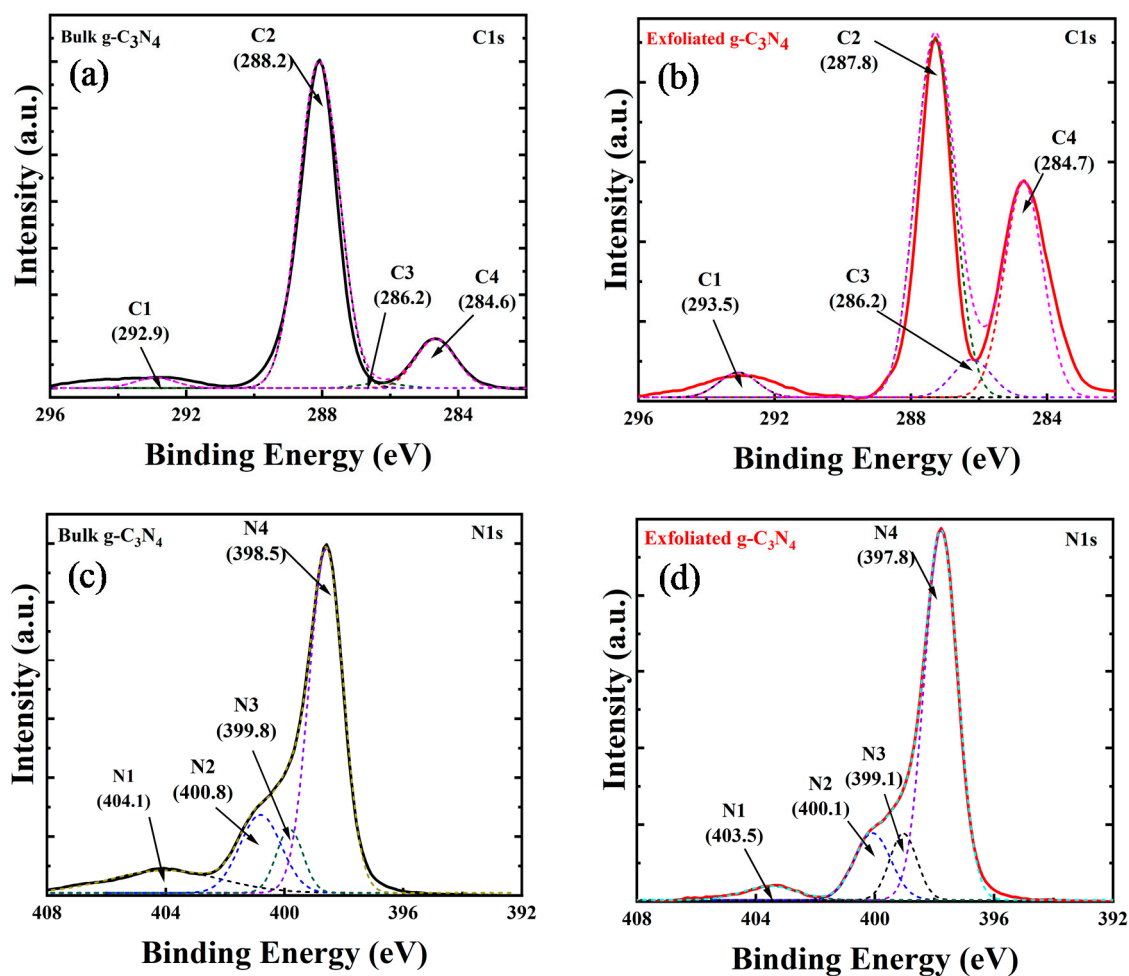

Figure S3 XPS spectra of bulk and exfoliated g-C<sub>3</sub>N<sub>4</sub> C1s, N1s

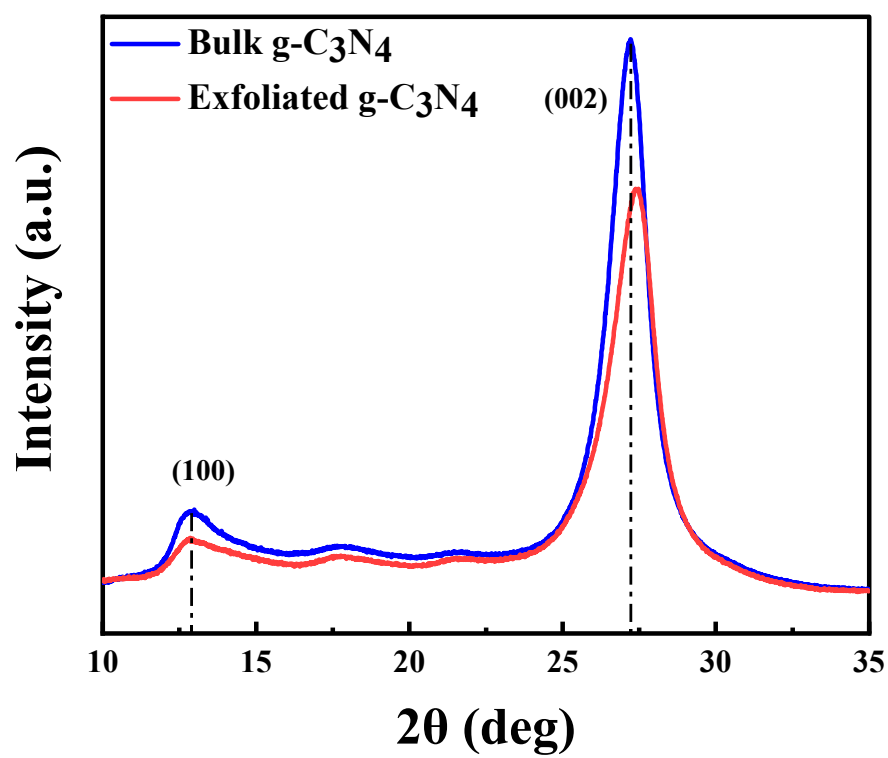

Figure S4 X-ray diffraction patterns of bulk and exfoliated g-C<sub>3</sub>N<sub>4</sub>
